1

# The ANTsX ecosystem for quantitative biological and medical imaging

2

3

4 Nicholas J. Tustison<sup>1,9</sup>, Philip A. Cook<sup>2</sup>, Andrew J. Holbrook<sup>3</sup>, Hans J. Johnson<sup>4</sup>, John  
5 Muschelli<sup>5</sup>, Gabriel A. Devenyi<sup>6</sup>, Jeffrey T. Duda<sup>2</sup>, Sandhitsu R. Das<sup>2</sup>, Nicholas C. Cullen<sup>7</sup>,  
6 Daniel L. Gillen<sup>8</sup>, Michael A. Yassa<sup>9</sup>, James R. Stone<sup>1</sup>, James C. Gee<sup>2</sup>, Brian B. Avants<sup>1</sup> for  
7 the Alzheimer's Disease Neuroimaging Initiative

8

<sup>1</sup>Department of Radiology and Medical Imaging, University of Virginia, Charlottesville, VA

9

<sup>2</sup>Department of Radiology, University of Pennsylvania, Philadelphia, PA

10

<sup>3</sup>Department of Biostatistics, University of California, Los Angeles, CA

11

<sup>4</sup>Department of Electrical and Computer Engineering, University of Iowa, Philadelphia, PA

12

<sup>5</sup>School of Public Health, Johns Hopkins University, Baltimore, MD

13

<sup>6</sup>Douglas Mental Health University Institute, Department of Psychiatry, McGill University, Montreal, QC

14

<sup>7</sup>Lund University, Scania, SE

15

<sup>8</sup>Department of Statistics, University of California, Irvine, CA

16

<sup>9</sup>Department of Neurobiology and Behavior, University of California, Irvine, CA

17 Corresponding author:  
18 Nicholas J. Tustison, DSc  
19 Department of Radiology and Medical Imaging  
20 University of Virginia  
21 [ntustison@virginia.edu](mailto:ntustison@virginia.edu)

## 22 Abstract

23 The Advanced Normalizations Tools ecosystem, known as ANTsX, consists of multiple open-  
24 source software libraries which house top-performing algorithms used worldwide by scientific  
25 and research communities for processing and analyzing biological and medical imaging data.  
26 The base software library, ANTs, is built upon, and contributes to, the NIH-sponsored  
27 Insight Toolkit. Founded in 2008 with the highly regarded Symmetric Normalization image  
28 registration framework, the ANTs library has since grown to include additional functionality.  
29 Recent enhancements include statistical, visualization, and deep learning capabilities through  
30 interfacing with both the R statistical project (ANTsR) and Python (ANTsPy). Additionally,  
31 the corresponding deep learning extensions ANTsRNet and ANTsPyNet (built on the popular  
32 TensorFlow/Keras libraries) contain several popular network architectures and trained models  
33 for specific applications. One such comprehensive application is a deep learning analog  
34 for generating cortical thickness data from structural T1-weighted brain MRI, both cross-  
35 sectionally and longitudinally. These pipelines significantly improve computational efficiency  
36 and provide comparable-to-superior accuracy over multiple criteria relative to the existing  
37 ANTs workflows and simultaneously illustrate the importance of the comprehensive ANTsX  
38 approach as a framework for medical image analysis.

## 39 **The ANTsX ecosystem: A brief overview**

### 40 **Image registration origins**

41 The Advanced Normalization Tools (ANTs) is a state-of-the-art, open-source software toolkit  
42 for image registration, segmentation, and other functionality for comprehensive biological  
43 and medical image analysis. Historically, ANTs is rooted in advanced image registration  
44 techniques which have been at the forefront of the field due to seminal contributions that  
45 date back to the original elastic matching method of Bajcsy and co-investigators.<sup>54,55,59</sup>  
46 Various independent platforms have been used to evaluate ANTs tools since their early  
47 development. In a landmark paper,<sup>65</sup> the authors reported an extensive evaluation using  
48 multiple neuroimaging datasets analyzed by fourteen different registration tools, including  
49 the Symmetric Normalization (SyN) algorithm,<sup>60</sup> and found that “ART, SyN, IRTK, and  
50 SPM’s DARTEL Toolbox gave the best results according to overlap and distance measures,  
51 with ART and SyN delivering the most consistently high accuracy across subjects and label  
52 sets.” Participation in other independent competitions<sup>62,69</sup> provided additional evidence of the  
53 utility of ANTs registration and other tools.<sup>13,14,42</sup> Despite the extremely significant potential  
54 of deep learning for image registration algorithmic development,<sup>41</sup> ANTs registration tools  
55 continue to find application in the various biomedical imaging research communities.

### 56 **Current developments**

57 Since its inception, though, ANTs has expanded significantly beyond its image registration  
58 origins. Other core contributions include template building,<sup>64</sup> segmentation,<sup>68</sup> image pre-  
59 processing (e.g., bias correction<sup>52</sup> and denoising),<sup>56</sup> joint label fusion,<sup>53,63</sup> and brain cortical  
60 thickness estimation<sup>57,66</sup> (cf Table 1). Additionally, ANTs has been integrated into multiple,  
61 publicly available workflows such as fMRIPrep<sup>50</sup> and the Spinal Cord Toolbox.<sup>49</sup> Frequently  
62 used ANTs pipelines, such as cortical thickness estimation,<sup>66</sup> have been integrated into Docker  
63 containers and packaged as Brain Imaging Data Structure (BIDS)<sup>48</sup> and FlyWheel applica-  
64 tions (i.e., “gears’”). It has also been independently ported for various platforms including  
65 Neurodebian<sup>47</sup> (Debian OS), Neuroconductor<sup>46</sup> (the R statistical project), and Nipype<sup>45</sup>

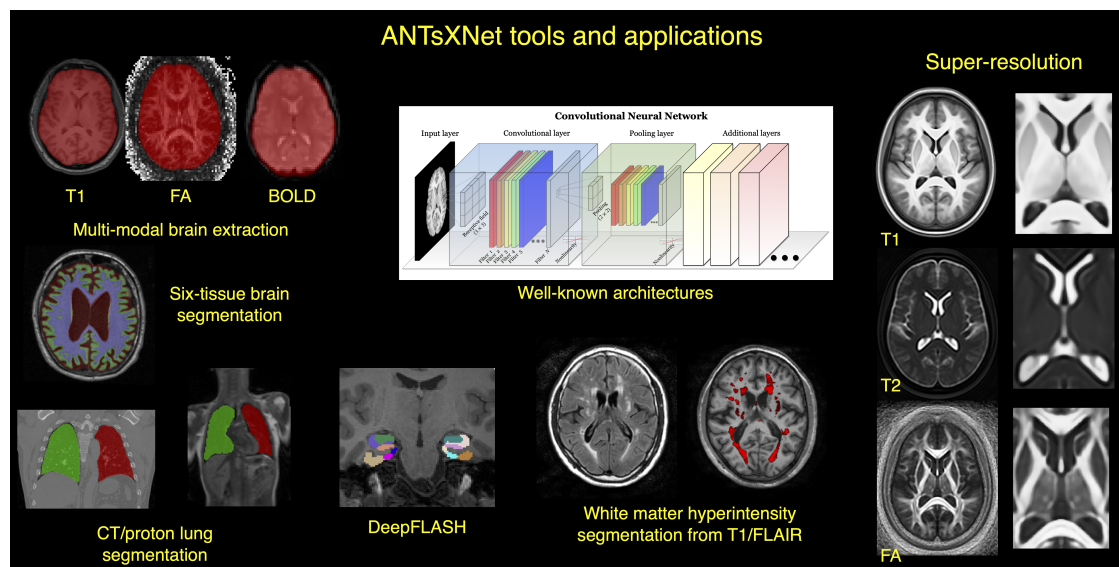

Figure 1: An illustration of the tools and applications available as part of the ANTsRNet and ANTsPyNet deep learning toolkits. Both libraries take advantage of ANTs functionality through their respective language interfaces—ANTsR (R) and ANTsPy (Python). Building on the Keras/TensorFlow language, both libraries standardize popular network architectures within the ANTs ecosystem and are cross-compatible. These networks are used to train models and weights for such applications as brain extraction which are then disseminated to the public.

66 (Python). Additionally, other widely used software, such as FreeSurfer,<sup>61</sup> have incorporated  
67 well-performing and complementary ANTs components<sup>52,56</sup> into their own libraries. According  
68 to GitHub, recent unique “clones” have averaged 34 per day with the total number of clones  
69 being approximately twice that many. 50 unique contributors to the ANTs library have made  
70 a total of over 4500 commits. Additional insights into usage can be viewed at the ANTs  
71 GitHub website.

72 Over the course of its development, ANTs has been extended to complementary frameworks  
73 resulting in the Python- and R-based ANTsPy and ANTsR toolkits, respectively. These  
74 ANTs-based packages interface with extremely popular, high-level, open-source programming  
75 platforms which have significantly increased the user base of ANTs. The rapidly rising  
76 popularity of deep learning motivated further recent enhancement of ANTs and its extensions.  
77 Despite the existence of an abundance of online innovation and code for deep learning  
78 algorithms, much of it is disorganized and lacks a uniformity in structure and external data  
79 interfaces which would facilitate greater uptake. With this in mind, ANTsR spawned the deep

| Functionality                                    | Citations |
|--------------------------------------------------|-----------|
| SyN registration <sup>5</sup>                    | 2616      |
| bias field correction <sup>16</sup>              | 2188      |
| ANTs registration evaluation <sup>6</sup>        | 2013      |
| joint label fusion <sup>18</sup>                 | 669       |
| template generation <sup>14</sup>                | 423       |
| cortical thickness: implementation <sup>20</sup> | 321       |
| MAP-MRF segmentation <sup>15</sup>               | 319       |
| ITK integration <sup>12</sup>                    | 250       |
| cortical thickness: theory <sup>19</sup>         | 180       |

Table 1: The significance of core ANTs tools in terms of their number of citations (from October 17, 2020).

80 learning ANTsRNet package<sup>32</sup> which is a growing Keras/TensorFlow-based library of popular  
81 deep learning architectures and applications specifically geared towards medical imaging.  
82 Analogously, ANTsPyNet is an additional ANTsX complement to ANTsPy. Both, which we  
83 collectively refer to as “ANTsXNet”, are co-developed so as to ensure cross-compatibility  
84 such that training performed in one library is readily accessible by the other library. In  
85 addition to a variety of popular network architectures (which are implemented in both 2-D  
86 and 3-D), ANTsXNet contains a host of functionality for medical image analysis that have  
87 been developed in-house and collected from other open-source projects. For example, an  
88 extremely popular ANTsXNet application is a multi-modal brain extraction tool that uses  
89 different variants of the popular U-net<sup>44</sup> architecture for segmenting the brain in multiple  
90 modalities. These modalities include conventional T1-weighted structural MRI as well as  
91 T2-weighted MRI, FLAIR, fractional anisotropy, and BOLD data. Demographic specialization  
92 also includes infant T1-weighted and/or T2-weighted MRI. Additionally, we have included  
93 other models and weights into our libraries such as a recent BrainAGE estimation model,<sup>23</sup>  
94 based on > 14,000 individuals; HippMapp3r,<sup>43</sup> a hippocampal segmentation tool; the winning  
95 entry of the MICCAI 2017 white matter hyperintensity segmentation competition;<sup>40</sup> MRI  
96 super resolution using deep back-projection networks;<sup>22</sup> and NoBrainer, a T1-weighted brain  
97 extraction approach based on FreeSurfer (see Figure 1).

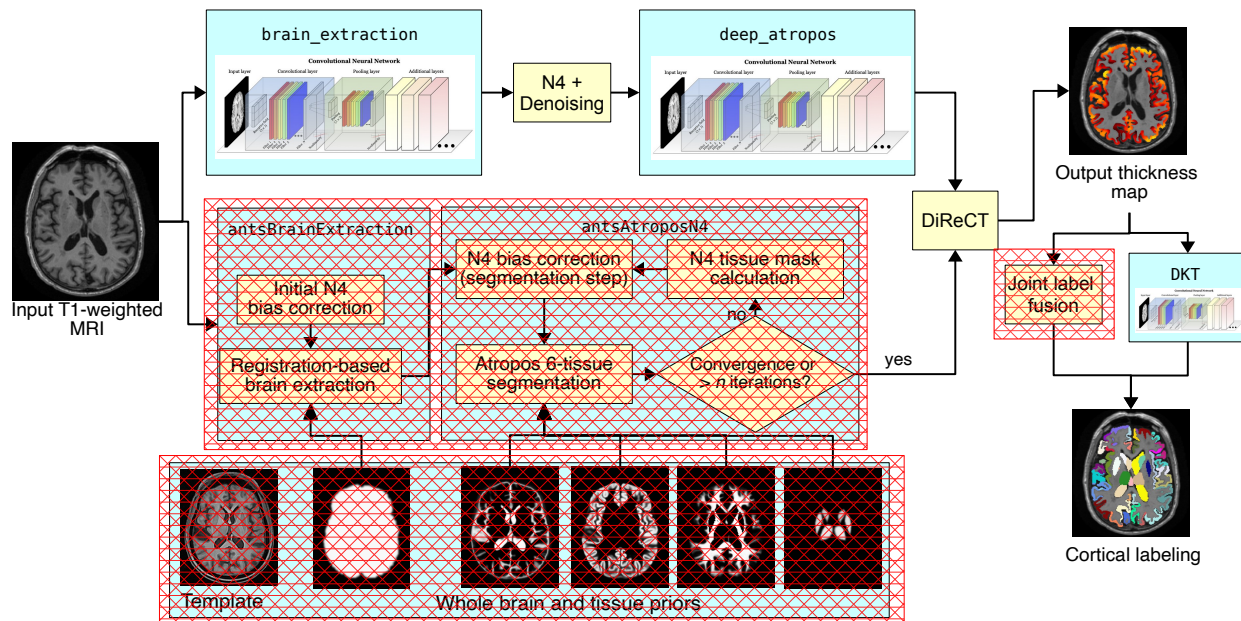

Figure 2: Illustration of the ANTsXNet cortical thickness pipeline and the relationship to its traditional ANTs analog. The hash-designated sections denote pipeline steps which have been obviated by the deep learning approach. These include template-based brain extraction, template-based  $n$ -tissue segmentation, and joint label fusion for cortical labeling. In our prior work, execution time of the thickness pipeline was dominated by registration. In the deep version of the pipeline, it is dominated by DiReCT. However, we note that registration and DiReCT execute much more quickly than in the past in part due to major improvements in the underlying ITK multi-threading strategy.

## 98 The ANTsXNet cortical thickness pipeline

99 The most recent ANTsX innovation involves the development of deep learning analogs of  
 100 our popular ANTs cortical thickness cross-sectional<sup>66</sup> and longitudinal<sup>51</sup> pipelines within  
 101 the ANTsXNet framework. Figure 2, adapted from our previous work,<sup>66</sup> illustrates some of  
 102 the major changes associated with the single-subject, cross-sectional pipeline. The resulting  
 103 improvement in efficiency derives primarily from eliminating deformable image registration  
 104 from the pipeline—a step which has historically been used to propagate prior, population-  
 105 based information (e.g., tissue maps) to individual subjects for such tasks as brain extraction<sup>58</sup>  
 106 and tissue segmentation<sup>68</sup> which is now configured within the neural networks and trained  
 107 weights.

108 These structural MRI processing pipelines are currently available as open-source within the

109 ANTsXNet libraries. Evaluations using both cross-sectional and longitudinal data are de-  
110 scribed in subsequent sections and couched within the context of our previous publications.<sup>51,66</sup>  
111 Related work has been recently reported by external groups<sup>38,39</sup> and provides a context for  
112 comparison to motivate the utility of the ANTsX ecosystem.

## 113 Results

### 114 Cross-sectional performance evaluation

---

---

|                                     |                                         |
|-------------------------------------|-----------------------------------------|
| 1) caudal anterior cingulate (cACC) | 17) pars orbitalis (pORB)               |
| 2) caudal middle frontal (cMFG)     | 18) pars triangularis (pTRI)            |
| 3) cuneus (CUN)                     | 19) pericalcarine (perICAL)             |
| 4) entorhinal (ENT)                 | 20) postcentral (postC)                 |
| 5) fusiform (FUS)                   | 21) posterior cingulate (PCC)           |
| 6) inferior parietal (IPL)          | 22) precentral (preC)                   |
| 7) inferior temporal (ITG)          | 23) precuneus (PCUN)                    |
| 8) isthmus cingulate (iCC)          | 24) rosterior anterior cingulate (rACC) |
| 9) lateral occipital (LOG)          | 25) rostral middle frontal (rMFG)       |
| 10) lateral orbitofrontal (LOF)     | 26) superior frontal (SFG)              |
| 11) lingual (LING)                  | 27) superior parietal (SPL)             |
| 12) medial orbitofrontal (MOF)      | 28) superior temporal (STG)             |
| 13) middle temporal (MTG)           | 29) supramarginal (SMAR)                |
| 14) parahippocampal (PARH)          | 30) transverse temporal (TT)            |
| 15) paracentral (paraC)             | 31) insula (INS)                        |
| 16) pars opercularis (pOPER)        |                                         |

---

Table 2: The 31 cortical labels (per hemisphere) of the Desikan-Killiany-Tourville atlas. The ROI abbreviations from the R `brainGraph` package are given in parentheses and used in later figures.

115 Due to the absence of ground-truth, we utilize the evaluation strategy from our previous  
116 work<sup>66</sup> where we used cross-validation to build and compare age prediction models from  
117 data derived from both the proposed ANTsXNet pipeline and the established ANTs pipeline.  
118 Specifically, we use “age” as a well-known and widely-available demographic correlate of  
119 cortical thickness<sup>30</sup> and quantify the predictive capabilities of corresponding random forest  
120 classifiers<sup>19</sup> of the form:

$$AGE \sim VOLUME + GENDER + \sum_{i=1}^{62} T(DKT_i) \quad (1)$$

121 with covariates *GENDER* and *VOLUME* (i.e., total intracranial volume).  $T(DKT_i)$  is the  
122 average thickness value in the  $i^{th}$  Desikian-Killiany-Tourville (DKT) region<sup>35</sup> (cf Table 2).  
123 Root mean square error (RMSE) between the actual and predicted ages are the quantity  
124 used for comparative evaluation. As we have explained previously,<sup>66</sup> we find these evaluation  
125 measures to be much more useful than other commonly applied criteria as they are closer to  
126 assessing the actual utility of these thickness measurements as biomarkers for disease<sup>21</sup> or  
127 growth. In recent work<sup>39</sup> the authors employ correlation with FreeSurfer thickness values as  
128 the primary evaluation for assessing relative performance with ANTs cortical thickness.<sup>66</sup>  
129 This evaluation, unfortunately, is fundamentally flawed in that it is a prime example of a  
130 type of circularity analysis<sup>29</sup> whereby data selection is driven by the same criteria used to  
131 evaluate performance. Specifically, the underlying DeepSCAN network used for the tissue  
132 segmentation step employs training based on FreeSurfer results which directly influences  
133 thickness values as thickness/segmentation are highly correlated and vary characteristically  
134 between software packages. Relative performance with ANTs thickness (which does not use  
135 FreeSurfer for training) is then assessed by determining correlations with FreeSurfer thickness  
136 values. Almost as problematic is their use of repeatability, which they confusingly label  
137 as “robustness,” as an additional ranking criterion. Repeatability evaluations should be  
138 contextualized within considerations such as the bias-variance tradeoff and quantified using  
139 relevant metrics, such as the intra-class correlation coefficient which takes into account both  
140 inter- and intra-observer variability.

141 In addition to the training data listed above, to ensure generalizability, we also compared  
142 performance using the SRPB data set<sup>15</sup> comprising over 1600 participants from 12 sites. Note  
143 that we recognize that we are processing a portion of the evaluation data through certain  
144 components of the proposed deep learning-based pipeline that were used to train the same  
145 pipeline components. Although this does not provide evidence for generalizability (which is  
146 why we include the much larger SRPB data set), it is still interesting to examine the results  
147 since, in this case, the deep learning training can be considered a type of noise reduction on



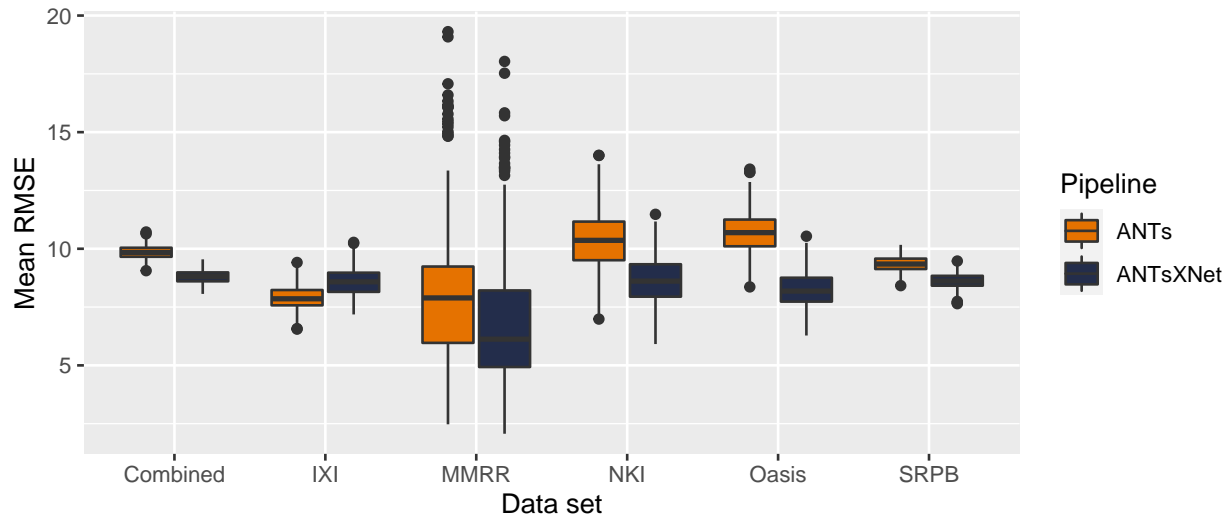

Figure 3: Distribution of mean RMSE values (500 permutations) for age prediction across the different data sets between the traditional ANTs and deep learning-based ANTsXNet pipelines. Total mean values are as follows: Combined—9.3 years (ANTs) and 8.2 years (ANTsXNet); IXI—7.9 years (ANTs) and 8.6 years (ANTsXNet); MMRR—7.9 years (ANTs) and 7.6 years (ANTsXNet); NKI—8.7 years (ANTs) and 7.9 years (ANTsXNet); OASIS—9.2 years (ANTs) and 8.0 years (ANTsXNet); and SRPB—9.2 years (ANTs) and 8.1 years (ANTsXNet).

148 the final results. It should be noted that training did not use age prediction (or any other  
149 evaluation or related measure) as a criterion to be optimized during network model training  
150 (i.e., circular analysis).<sup>29</sup>

151 The results are shown in Figure 3 where we used cross-validation with 500 permutations  
152 per model per data set (including a “combined” set) and an 80/20 training/testing split.  
153 The ANTsXNet deep learning pipeline outperformed the classical pipeline<sup>66</sup> in terms of age  
154 prediction in all data sets except for IXI. This also includes the cross-validation iteration  
155 where all data sets were combined. Additionally, repeatability assessment on [the regional](#)  
156 [cortical thickness values of the](#) MMRR data set yielded ICC values (“average random rater”)  
157 of 0.99 for both pipelines.

158 [A comparative illustration of regional thickness measurements between the ANTs and](#)  
159 [ANTsXNet pipelines is provided in Figure 4 for three different ages spanning the lifespan.](#)  
160 [Linear models of the form](#)

$$T(DKT_i) \sim GENDER + AGE \quad (2)$$

161 were created for each of the 62 DKT regions for each pipeline. These models were then used  
 162 to predict thickness values for each gender at ages of 25 years, 50 years, and 75 years and  
 163 subsequently plotted relative to the absolute maximum predicted thickness value (ANTs:  
 164 right entorhinal cortex at 25 years, male). Although there appear to be systematic differences  
 165 between specific regional predicted thickness values (e.g.,  $T(ENT)_{ANTs} > T(ENT)_{ANTsXNet}$ ,  
 166  $T(pORB)_{ANTs} < T(pORB)_{ANTsXNet}$ ), a pairwise t-test evidenced no statistically significant  
 167 difference between the predicted thickness values of the two pipelines.

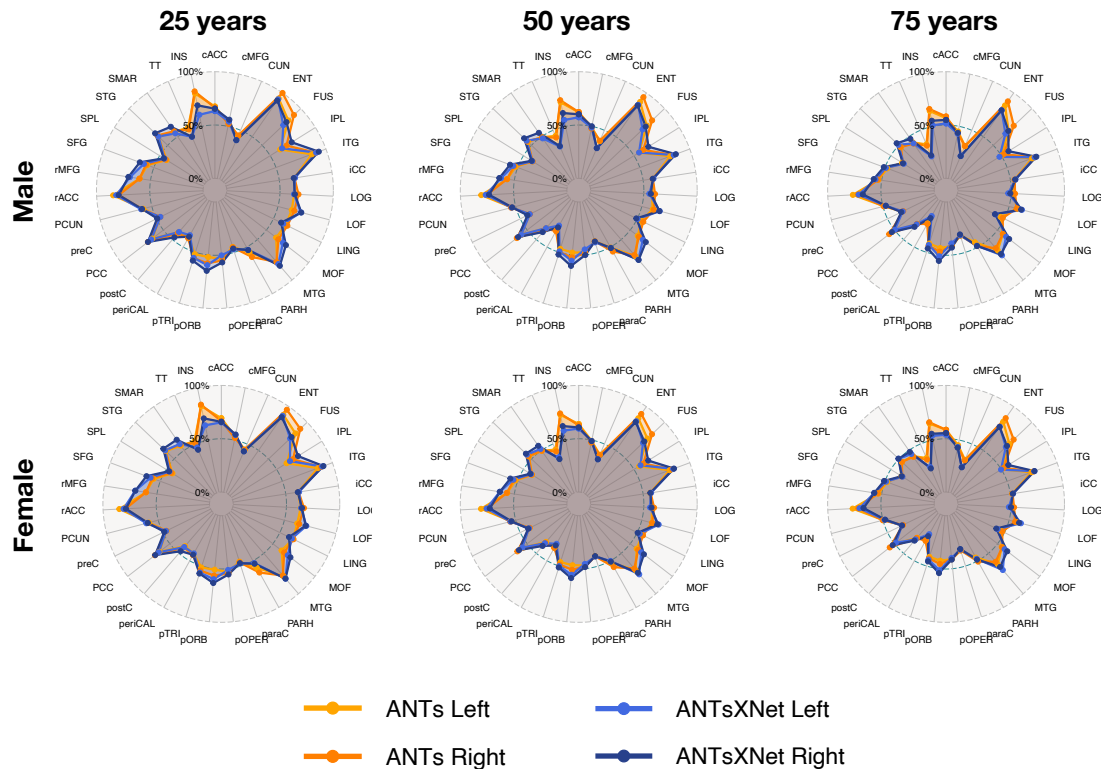

Figure 4: Radar plots enabling comparison of relative thickness values between the ANTs and ANTsXNet cortical thickness pipelines at three different ages sampling the life span. See Table 2 for region abbreviations.

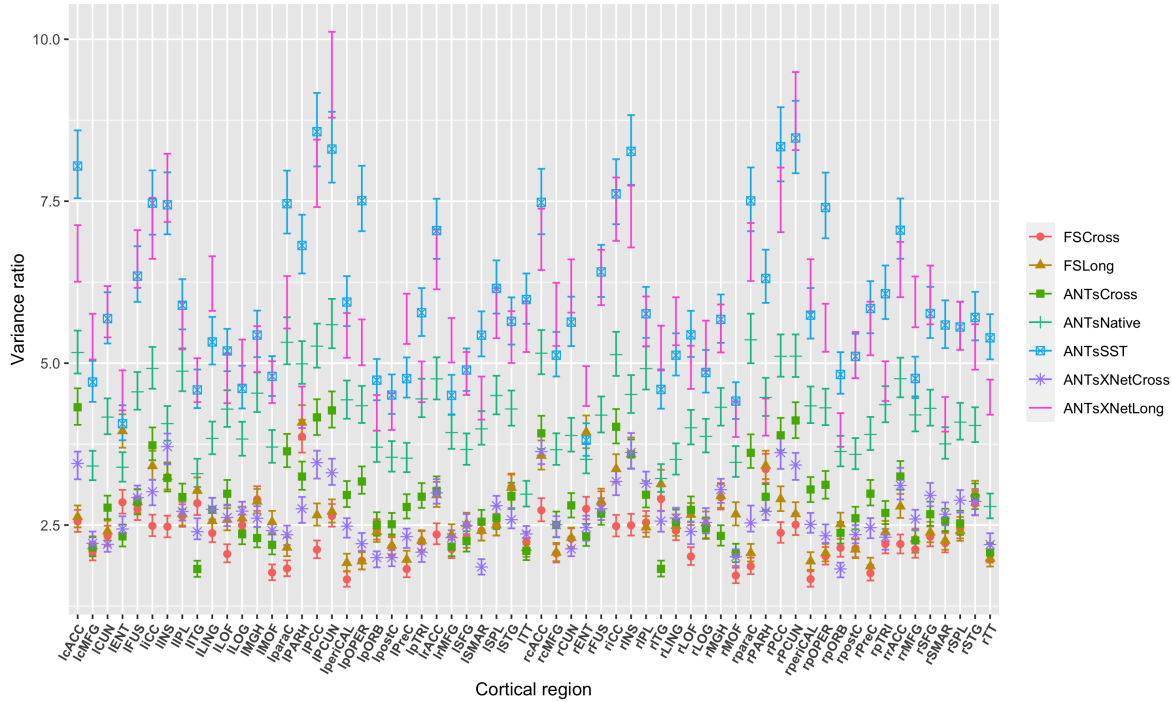

(a)

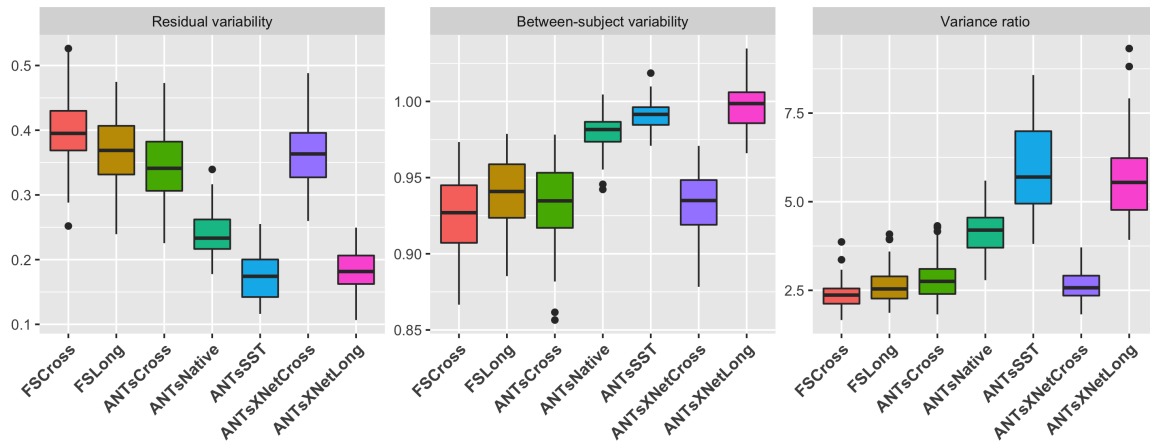

(b)

Figure 5: Performance over longitudinal data as determined by the variance ratio. (a) Region-specific 95% confidence intervals of the variance ratio showing the superior performance of the longitudinally tailored ANTsX-based pipelines, including ANTsSST and ANTsXNetLong. (b) Residual variability, between subject, and variance ratio values per pipeline over all DKT regions.

## 168 Longitudinal performance evaluation

169 Given the excellent performance and superior computational efficiency of the proposed  
 170 ANTsXNet pipeline for cross-sectional data, we evaluated its performance on longitudinal

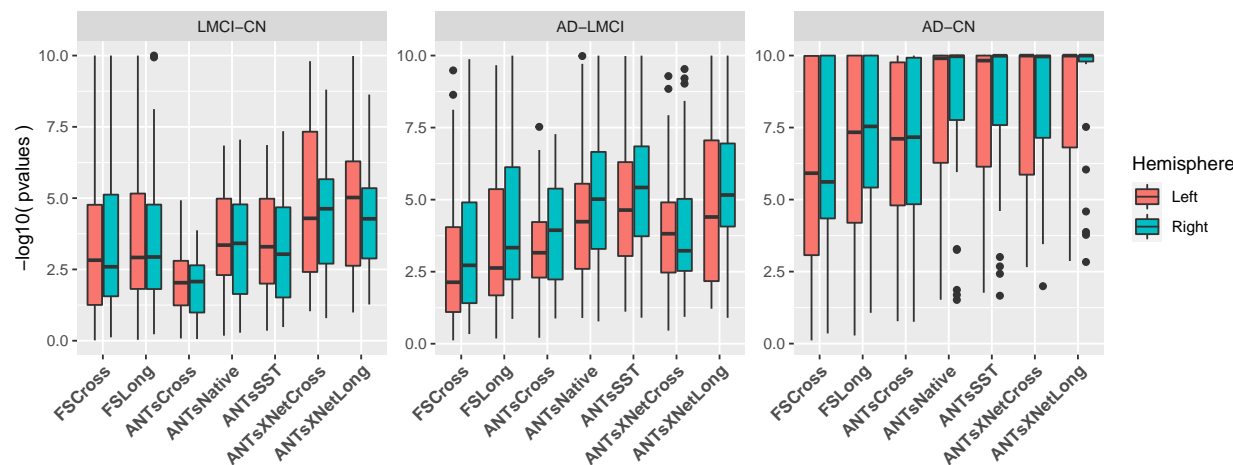

Figure 6: Measures for the supervised evaluation strategy where log p-values for diagnostic differentiation of LMCI-CN, AD-LMCI, and AD-CN subjects are plotted for all pipelines over all DKT regions.

171 data using the longitudinally-specific evaluation strategy and data we employed with the  
172 introduction of the longitudinal version of the ANTs cortical thickness pipeline.<sup>51</sup> We also  
173 evaluated an ANTsXNet-based pipeline tailored specifically for longitudinal data. In this  
174 variant, an SST is generated and processed using the previously described ANTsXNet cross-  
175 sectional pipeline which yields tissue spatial priors. These spatial priors are used in our  
176 traditional brain segmentation approach<sup>68</sup>. The computational efficiency of this variant is  
177 also significantly improved, in part, due to the elimination of the costly SST prior generation  
178 which uses multiple registrations combined with joint label fusion.<sup>53</sup>

179 The ADNI-1 data used for our longitudinal performance evaluation<sup>51</sup> consists of over 600  
180 subjects (197 cognitive normals, 324 LMCI subjects, and 142 AD subjects) with one or  
181 more follow-up image acquisition sessions every 6 months (up to 36 months) for a total  
182 of over 2500 images. In addition to the ANTsXNet pipelines (“ANTsXNetCross” and  
183 “ANTsXNetLong”) for the current evaluation, our previous work included the FreeSurfer<sup>61</sup>  
184 cross-sectional (“FSCross”) and longitudinal (“FSLong”) streams, the ANTs cross-sectional  
185 pipeline (“ANTsCross”) in addition to two longitudinal ANTs-based variants (“ANTsNative”  
186 and “ANTsSST”). Two evaluation measurements, one unsupervised and one supervised, were  
187 used to assess comparative performance between all seven pipelines. We add the results of  
188 the ANTsXNet pipeline cross-sectional and longitudinal evaluations in relation to these other

189 pipelines to provide a comprehensive overview of relative performance.

First, linear mixed-effects (LME)<sup>20</sup> modeling was used to quantify between-subject and residual variabilities, the ratio of which provides an estimate of the effectiveness of a given biomarker for distinguishing between subpopulations. In order to assess this criteria while accounting for changes that may occur through the passage of time, we used the following Bayesian LME model:

$$\begin{aligned} Y_{ij}^k &\sim N(\alpha_i^k + \beta_i^k t_{ij}, \sigma_k^2) \\ \alpha_i^k &\sim N(\alpha_0^k, \tau_k^2) \quad \beta_i^k \sim N(\beta_0^k, \rho_k^2) \\ \alpha_0^k, \beta_0^k &\sim N(0, 10) \quad \sigma_k, \tau_k, \rho_k \sim \text{Cauchy}^+(0, 5) \end{aligned} \quad (3)$$

where  $Y_{ij}^k$  denotes the  $i^{\text{th}}$  individual's cortical thickness measurement corresponding to the  $k^{\text{th}}$  region of interest at the time point indexed by  $j$  and specification of variance priors to half-Cauchy distributions reflects commonly accepted best practice in the context of hierarchical models.<sup>28</sup> The ratio of interest,  $r^k$ , per region of the between-subject variability,  $\tau_k$ , and residual variability,  $\sigma_k$  is

$$r^k = \frac{\tau_k}{\sigma_k}, k = 1, \dots, 62 \quad (4)$$

190 where the posterior distribution of  $r_k$  was summarized via the posterior median.

Second, the supervised evaluation employed Tukey post-hoc analyses with false discovery rate (FDR) adjustment to test the significance of the LMCI-CN, AD-LMCI, and AD-CN diagnostic contrasts. This is provided by the following LME model

$$\begin{aligned} \Delta Y &\sim Y_{bl} + AGE_{bl} + ICV_{bl} + APOE_{bl} + GENDER + DIAGNOSIS_{bl} \\ &+ VISIT : DIAGNOSIS_{bl} + (1|ID) + (1|SITE). \end{aligned} \quad (5)$$

191 Here,  $\Delta Y$  is the change in thickness of the  $k^{\text{th}}$  DKT region from baseline (bl) thickness  
192  $Y_{bl}$  with random intercepts for both the individual subject ( $ID$ ) and the acquisition site.  
193 The subject-specific covariates  $AGE$ ,  $APOE$  status,  $GENDER$ ,  $DIAGNOSIS$ ,  $ICV$ , and

194 *VISIT* were taken directly from the ADNIMERGE package.

195 Results for all pipelines with respect to the longitudinal evaluation criteria are shown in  
196 Figures 5 and 6. Figure 5(a) provides the 95% confidence intervals of the variance ratio for  
197 all 62 regions of the DKT cortical labeling where ANTsSST consistently performs best with  
198 ANTsXNetLong also performing well. These quantities are summarized in Figure 5(b). The  
199 second evaluation criteria compares diagnostic differentiation via LMEs. Log p-values are  
200 provided in Figure 6 which demonstrate excellent LMCI-CN and AD-CN differentiation for  
201 both deep learning pipelines.

## 202 Discussion

203 The ANTsX software ecosystem provides a comprehensive framework for quantitative biologi-  
204 cal and medical imaging. Although ANTs, the original core of ANTsX, is still at the forefront  
205 of image registration technology, it has moved significantly beyond its image registration  
206 origins. This expansion is not confined to technical contributions (of which there are many)  
207 but also consists of facilitating access to a wide range of users who can use ANTsX tools  
208 (whether through bash, Python, or R scripting) to construct tailored pipelines for their own  
209 studies or to take advantage of our pre-fabricated pipelines. And given the open-source  
210 nature of the ANTsX software, usage is not limited, for example, to [non-commercial](#) use—a  
211 common constraint characteristic of other packages [such as the FMRIB Software Library](#)  
212 (<https://fsl.fmrib.ox.ac.uk/fsl/fslwiki/Licence>).

213 One of our most widely used pipelines is the estimation of cortical thickness from neuroimag-  
214 ing. This is understandable given the widespread usage of regional cortical thickness as a  
215 biomarker for developmental or pathological trajectories of the brain. In this work, we used  
216 this well-vetted ANTs tool to provide training data for producing alternative variants which  
217 leverage deep learning for improved computational efficiency and also provides superior perfor-  
218 mance with respect to previously proposed evaluation measures for both cross-sectional<sup>66</sup> and  
219 longitudinal scenarios.<sup>51</sup> In addition to providing the tools which generated the original train-  
220 ing data for the proposed ANTsXNet pipeline, the ANTsX ecosystem provides a full-featured

221 platform for the additional steps such as preprocessing (ANTsR/ANTsPy); data augmen-  
222 tation (ANTsR/ANTsPy); network construction and training (ANTsRNet/ANTsPyNet); and  
223 visualization and statistical analysis of the results (ANTsR/ANTsPy).

224 It is the comprehensiveness of ANTsX that provides several advantages over much of the  
225 deep learning work that is currently taking place in medical imaging. In other words, various  
226 steps in the deep learning training processing (e.g., data augmentation, preprocessing) can all  
227 be performed within the same ecosystem where such important details as header information  
228 for image geometry are treated the same. In contrast, related work<sup>39</sup> described and evaluated  
229 a similar thickness measurement pipeline. However, due to the lack of a complete processing  
230 and analysis framework, training data was generated using the FreeSurfer stream, deep  
231 learning-based brain segmentation employed DeepSCAN<sup>27</sup> (in-house software), and cortical  
232 thickness estimation<sup>57</sup> was generated using the ANTs toolkit. The interested researcher must  
233 ensure the consistency of the input/output interface between packages (a task for which the  
234 Nipype development team is quite familiar.)

235 Although potentially advantageous in terms of such issues as computational efficiency and  
236 other performance measures, there are a number of limitations associated with the ANTsXNet  
237 pipeline that should be mentioned both to guide potential users and possibly motivate future  
238 related research. As is the case with many deep learning models, usage is restricted based on  
239 training data. For example, much of the publicly available brain data has been anonymized  
240 through various defacing protocols. That is certainly the case with the training data used for  
241 the ANTsXNet pipeline which has consequences specific to the brain extraction step which  
242 could lead to poor performance. We are currently aware of this issue and have provided  
243 a temporary workaround while simultaneously resuming training on whole head data to  
244 mitigate this issue. Related, although the ANTsXNet pipeline performs relatively well as  
245 assessed across lifespan data, performance might be hampered for specific age ranges (e.g.,  
246 neonates), whereas the traditional ANTs cortical thickness pipeline is more flexible and might  
247 provide better age-targeted performance. This is the subject of ongoing research. Additionally,  
248 application of the ANTsXNet pipeline would be limited with high-resolution acquisitions.  
249 Due to the heavy memory requirements associated with deep learning training, the utility of

250 any resolution greater than 1 mm isotropic would not be leveraged by the existing pipeline.  
251 However, there is a potential pipeline variation (akin to the longitudinal variant) that would  
252 be worth exploring where Deep Atropos is used only to provide the priors for a subsequent  
253 traditional Atropos segmentation on high-resolution data.

254 In terms of additional future work, the recent surge and utility of deep learning in medical  
255 image analysis has significantly guided the areas of active ANTsX development. As demon-  
256 strated in this work with our widely used cortical thickness pipelines, there are many potential  
257 benefits of deep learning analogs to existing ANTs tools as well as the development of new  
258 ones. Performance is mostly comparable-to-superior relative to existing pipelines depending  
259 on the evaluation metric. Specifically, the ANTsXNet cross-sectional pipeline does well for  
260 the age prediction performance framework and in terms of the ICC. Additionally, this pipeline  
261 performs relatively well for longitudinal ADNI data for disease differentiation but not so  
262 much in terms of the generic variance ratio criterion. However, for such longitudinal-specific  
263 studies, the ANTsXNet longitudinal variant performs well for both performance measures.  
264 We see possible additional longitudinal extensions incorporating subject ID and months as  
265 additional network inputs.

## 266 **Methods**

### 267 **The original ANTs cortical thickness pipeline**

268 The original ANTs cortical thickness pipeline<sup>66</sup> consists of the following steps:

- 269 • preprocessing: denoising<sup>56</sup> and bias correction;<sup>67</sup>
- 270 • brain extraction;<sup>58</sup>
- 271 • brain segmentation with spatial tissue priors<sup>68</sup> comprising the
  - 272 – cerebrospinal fluid (CSF),
  - 273 – gray matter (GM),
  - 274 – white matter (WM),
  - 275 – deep gray matter,
  - 276 – cerebellum, and



- 277           – brain stem; and
- 278           • cortical thickness estimation.<sup>57</sup>

279 Our recent longitudinal variant<sup>51</sup> incorporates an additional step involving the construction  
280 of a single subject template (SST)<sup>64</sup> coupled with the generation of tissue spatial priors of  
281 the SST for use with the processing of the individual time points as described above.

282 Although the resulting thickness maps are conducive to voxel-based<sup>36</sup> and related analyses<sup>37</sup>,  
283 here we employ the well-known Desikan-Killiany-Tourville (DKT)<sup>35</sup> labeling protocol (31  
284 labels per hemisphere) to parcellate the cortex for averaging thickness values regionally (cf  
285 Table 2). This allows us to 1) be consistent in our evaluation strategy for comparison with  
286 our previous work<sup>51,66</sup> and 2) leverage an additional deep learning-based substitution within  
287 the proposed pipeline.

## 288 **Overview of cortical thickness via ANTsXNet**

289 The entire analysis/evaluation framework, from preprocessing to statistical analysis, is made  
290 possible through the ANTsX ecosystem and simplified through the open-source R and  
291 Python platforms. Preprocessing, image registration, and cortical thickness estimation are  
292 all available through the ANTsPy and ANTsR libraries whereas the deep learning steps are  
293 performed through networks constructed and trained via ANTsRNet/ANTsPyNet with data  
294 augmentation strategies and other utilities built from ANTsR/ANTsPy functionality.

295 The brain extraction, brain segmentation, and DKT parcellation deep learning components  
296 were trained using data derived from our previous work.<sup>66</sup> Specifically, the IXI,<sup>18</sup> MMRR,<sup>31</sup>  
297 NKI,<sup>17</sup> and OASIS<sup>16</sup> data sets, and the corresponding derived data, comprising over 1200  
298 subjects from age 4 to 94, were used for network training. Brain extraction employs a  
299 traditional 3-D U-net network<sup>44</sup> with whole brain, template-based data augmentation<sup>32</sup>  
300 whereas brain segmentation and DKT parcellation are processed via 3-D U-net networks with  
301 attention gating<sup>33</sup> on image octant-based batches. [Additional network architecture details](#)  
302 [are given below](#). We emphasize that a single model (as opposed to ensemble approaches  
303 where multiple models are used to produce the final solution)<sup>40</sup> was created for each of these  
304 steps and was used for all the experiments described below.

## 305 Implementation

306 Software, average DKT regional thickness values for all data sets, and the scripts to perform  
307 both the analysis and obtain thickness values for a single subject (cross-sectionally or  
308 longitudinally) are provided as open-source. Specifically, all the ANTsX libraries are hosted  
309 on GitHub (<https://github.com/ANTsX>). The cross-sectional data and analysis code  
310 are available as .csv files and R scripts at the GitHub repository dedicated to this paper  
311 (<https://github.com/ntustison/PaperANTsX>) whereas the longitudinal data and evaluation  
312 scripts are organized with the repository associated with our previous work<sup>51</sup> ([https://github](https://github.com/ntustison/CrossLong)  
313 [.com/ntustison/CrossLong](https://github.com/ntustison/CrossLong)).

```
314 

---


315 import ants
316 import antspynet
317
318 # ANTsPy/ANTsPyNet processing for subject IXI002-Guys-0828-T1
319 t1_file = "IXI002-Guys-0828-T1.nii.gz"
320 t1 = ants.image_read(t1_file)
321
322 # Atropos six-tissue segmentation
323 atropos = antspynet.deep_atropos(t1, do_preprocessing=True, verbose=True)
324
325 # Kelly Kapowski cortical thickness (combine Atropos WM and deep GM)
326 kk_segmentation = atropos['segmentation_image']
327 kk_segmentation[kk_segmentation == 4] = 3
328 kk_gray_matter = atropos['probability_images'][2]
329 kk_white_matter = atropos['probability_images'][3] + atropos['probability_images'][4]
330 kk = ants.kelly_kapowski(s=kk_segmentation, g=kk_gray_matter, w=kk_white_matter,
331                        its=45, r=0.025, m=1.5, x=0, verbose=1)
332
333 # Desikan-Killiany-Tourville labeling
334 dkt = antspynet.desikan_killiany_tourville_labeling(t1, do_preprocessing=True, verbose=True)
335
336 # DKT label propagation throughout the cortex
337 dkt_cortical_mask = ants.threshold_image(dkt, 1000, 3000, 1, 0)
338 dkt = dkt_cortical_mask * dkt
339 kk_mask = ants.threshold_image(kk, 0, 0, 0, 1)
340 dkt_propagated = ants.iMath(kk_mask, "PropagateLabelsThroughMask", kk_mask * dkt)
341
342 # Get average regional thickness values
343 kk_regional_stats = ants.label_stats(kk, dkt_propagated)
```

Listing 1: ANTsPy/ANTsPyNet command calls for a single IXI subject in the evaluation study for the cross-sectional pipeline.

345 In Listing 1, we show the ANTsPy/ANTsPyNet code snippet for cross-sectional processing  
346 a single subject which starts with reading the T1-weighted MRI input image, through the  
347 generation of the Atropos-style six-tissue segmentation and probability images, applica-  
348 tion of `ants.kelly_kapowski` (i.e., DiReCT), DKT cortical parcellation, subsequent label

349 propagation through the cortex, and, finally, regional cortical thickness tabulation. The  
350 cross-sectional and longitudinal pipelines are encapsulated in the ANTsPyNet functions  
351 `antspynet.cortical_thickness` and `antspynet.longitudinal_cortical_thickness`, re-  
352 spectively. Note that there are precise, line-by-line R-based analogs available through  
353 ANTsR/ANTsRNet.

354 Both the `ants.deep_atropos` and `antspynet.desikan_killiany_tourville_labeling`  
355 functions perform brain extraction using the `antspynet.brain_extraction` function. Inter-  
356 nally, `antspynet.brain_extraction` contains the requisite code to build the network and  
357 assign the appropriate hyperparameters. The model weights are automatically downloaded  
358 from the online hosting site <https://figshare.com> (see the function `get_pretrained_network`  
359 in ANTsPyNet or `getPretrainedNetwork` in ANTsRNet for links to all models and weights)  
360 and loaded to the constructed network. `antspynet.brain_extraction` performs a quick  
361 translation transformation to a specific template (also downloaded automatically) using the  
362 centers of intensity mass, a common alignment initialization strategy. This is to ensure  
363 proper gross orientation. Following brain extraction, preprocessing for the other two deep  
364 learning components includes `ants.denoise_image` and `ants.n4_bias_correction` and an  
365 affine-based reorientation to a version of the MNI template.<sup>34</sup>

366 We recognize the presence of some redundancy due to the repeated application of certain  
367 preprocessing steps. Thus, each function has a `do_preprocessing` option to eliminate this  
368 redundancy for knowledgeable users but, for simplicity in presentation purposes, we do not  
369 provide this modified pipeline here. Although it should be noted that the time difference is  
370 minimal considering the longer time required by `ants.kelly_kapowski`. `ants.deep_atropos`  
371 returns the segmentation image as well as the posterior probability maps for each tissue  
372 type listed previously. `antspynet.desikan_killiany_tourville_labeling` returns only  
373 the segmentation label image which includes not only the 62 cortical labels but the remaining  
374 labels as well. The label numbers and corresponding structure names are given in the program  
375 description/help. Because the DKT parcellation will, in general, not exactly coincide with  
376 the non-zero voxels of the resulting cortical thickness maps, we perform a label propagation  
377 step to ensure the entire cortex, and only the non-zero thickness values in the cortex, are

378 included in the tabulated regional values.

379 As mentioned previously, the longitudinal version, `antspynet.longitudinal_cortical_thickness`,  
380 adds an SST generation step which can either be provided as a program input or it can  
381 be constructed from spatial normalization of all time points to a specified template.  
382 `ants.deep_atropos` is applied to the SST yielding spatial tissues priors which are then used  
383 as input to `ants.atropos` for each time point. `ants.kelly_kapowski` is applied to the  
384 result to generate the desired cortical thickness maps.

385 Computational time on a CPU-only platform is approximately 1 hour primarily due to  
386 `ants.kelly_kapowski` processing. Other preprocessing steps, i.e., bias correction and de-  
387 noising, are on the order of a couple minutes. This total time should be compared with 4 – 5  
388 hours using the traditional pipeline employing the `quick` registration option or 10 – 15 hours  
389 with the more comprehensive registration parameters employed). As mentioned previously,  
390 elimination of the registration-based propagation of prior probability images to individual  
391 subjects is the principal source of reduced computational time. For ROI-based analyses, this  
392 is in addition to the elimination of the optional generation of a population-specific template.  
393 Additionally, the use of `antspynet.desikan_killiany_tourville_labeling`, for cortical  
394 labeling (which completes in less than five minutes) eliminates the need for joint label fusion  
395 which requires multiple pairwise registrations for each subject in addition to the fusion  
396 algorithm itself.

## 397 **Training details**

398 Training differed slightly between models and so we provide details for each of these com-  
399 ponents below. For all training, we used ANTsRNet scripts and custom batch generators.  
400 Although the network construction and other functionality is available in both ANTsPyNet  
401 and ANTsRNet (as is model weights compatibility), we have not written such custom batch  
402 generators for the former (although this is on our to-do list). In terms of hardware, all  
403 training was done on a DGX (GPUs: 4X Tesla V100, system memory: 256 GB LRDIMM  
404 DDR4).

405 **T1-weighted brain extraction.** A whole-image 3-D U-net model<sup>44</sup> was used in conjunction

406 with multiple training sessions employing a Dice loss function followed by categorical cross  
407 entropy. Training data was derived from the same multi-site data described previously  
408 processed through our registration-based approach.<sup>58</sup> A center-of-mass-based transformation  
409 to a standard template was used to standardize such parameters as orientation and voxel size.  
410 However, to account for possible different header orientations of input data, a template-based  
411 data augmentation scheme was used<sup>32</sup> whereby forward and inverse transforms are used  
412 to randomly warp batch images between members of the training population (followed by  
413 reorientation to the standard template). A digital random coin flipping for possible histogram  
414 matching<sup>26</sup> between source and target images further increased data augmentation. The  
415 output of the network is a probabilistic mask of the brain. [The architecture consists of](#)  
416 [four encoding/decoding layers with eight filters at the base layer which doubled every layer.](#)  
417 Although not detailed here, training for brain extraction in other modalities was performed  
418 similarly.

419 **Deep Atropos.** Dealing with 3-D data presents unique barriers for training that are often  
420 unique to medical imaging. Various strategies are employed such as minimizing the number  
421 of layers and/or the number of filters at the base layer of the U-net architecture (as we  
422 do for brain extraction). However, we found this to be too limiting for capturing certain  
423 brain structures such as the cortex. 2-D and 2.5-D approaches are often used with varying  
424 levels of success but we also found better performance using full 3-D information. This led  
425 us to try randomly selected 3-D patches of various sizes. However, for both the six-tissue  
426 segmentations and DKT parcellations, we found that an octant-based patch strategy yielded  
427 the desired results. Specifically, after a brain extracted affine normalization to the MNI  
428 template, the normalized image is cropped to a size of [160, 190, 160]. Overlapping octant  
429 patches of size [112, 112, 112] were extracted from each image and trained using a batch size  
430 of 12 such octant patches with weighted categorical cross entropy as the loss function. [The](#)  
431 [architecture consists of four encoding/decoding layers with 16 filters at the base layer which](#)  
432 [doubled every layer.](#)

433 As we point out in our earlier work,<sup>66</sup> obtaining proper brain segmentation is perhaps the  
434 most critical step to estimating thickness values that have the greatest utility as a potential

435 biomarker. In fact, the first and last authors (NT and BA, respectively) spent much time  
436 during the original ANTs pipeline development<sup>66</sup> trying to get the segmentation correct which  
437 required manually looking at many images and manually adjusting where necessary. This  
438 fine-tuning is often omitted or not considered when other groups<sup>24,25,39</sup> use components of our  
439 cortical thickness pipeline which can be potentially problematic<sup>70</sup>. Fine-tuning for this partic-  
440 ular workflow was also performed between the first and last authors using manual variation of  
441 the weights in the weighted categorical cross entropy. Specifically, the weights of each tissue  
442 type were altered in order to produce segmentations which most resemble the traditional  
443 Atropos segmentations. Ultimately, we settled on a weight vector of (0.05, 1.5, 1, 3, 4, 3, 3) for  
444 the CSF, GM, WM, Deep GM, brain stem, and cerebellum, respectively. Other hyperparam-  
445 eters can be directly inferred from explicit specification in the actual code. As mentioned  
446 previously, training data was derived from application of the ANTs Atropos segmentation<sup>68</sup>  
447 during the course of our previous work.<sup>66</sup> Data augmentation included small affine and  
448 deformable perturbations using `antspynet.randomly_transform_image_data` and random  
449 contralateral flips.

450 **Desikan-Killiany-Tourville parcellation.** Preprocessing for the DKT parcellation train-  
451 ing was similar to the Deep Atropos training. However, the number of labels and the  
452 complexity of the parcellation required deviation from other training steps. First, labeling  
453 was split into an inner set and an outer set. Subsequent training was performed separately  
454 for both of these sets. For the cortical labels, a set of corresponding input prior probability  
455 maps were constructed from the training data (and are also available and automatically  
456 downloaded, when needed, from <https://figshare.com>). Training occurred over multiple  
457 sessions where, initially, categorical cross entropy was used and then subsequently refined  
458 using a Dice loss function. Whole-brain training was performed on a brain-cropped template  
459 size of [96, 112, 96]. Inner label training was performed similarly to our brain extraction  
460 training where the number of layers at the base layer was reduced to eight. Training also  
461 occurred over multiple sessions where, initially, categorical cross entropy was used and then  
462 subsequently refined using a Dice loss function. Other hyperparameters can be directly  
463 inferred from explicit specification in the actual code. Training data was derived from  
464 application of joint label fusion<sup>63</sup> during the course of our previous work.<sup>66</sup> When call-

465 ing `antspynet.desikan_killiany_tourville_labeling`, inner labels are estimated first  
466 followed by the outer cortical labels.

## 467 **Other softwares**

468 Several R<sup>1</sup> packages were used in preparation of this manuscript including R Markdown,<sup>10-12</sup>  
469 lme4,<sup>7</sup> RStan,<sup>6</sup> ggplot2,<sup>9</sup> and ggradar2.<sup>8</sup> Other packages used include Apple Pages,<sup>3</sup> ITK-  
470 SNAP,<sup>2</sup> LibreOffice,<sup>4</sup> and diagrams.net.<sup>5</sup>

## 471 Acknowledgments

472 Support for the research reported in this work includes funding from the National Heart, Lung,  
473 and Blood Institute of the National Institutes of Health (R01HL133889) and a combined  
474 grant from Cohen Veterans Bioscience (CVB-461) and the Office of Naval Research (N00014-  
475 18-1-2440).

476 Data used in preparation of this article were obtained from the Alzheimer's Disease Neu-  
477 roimaging Initiative (ADNI) database (<http://adni.loni.usc.edu>). As such, the investigators  
478 within the ADNI contributed to the design and implementation of ADNI and/or provided  
479 data but did not participate in analysis or writing of this report. A complete listing of  
480 ADNI investigators can be found at: [http://adni.loni.usc.edu/wp-content/uploads/how to  
481 apply/AD NI Acknowledgement List.pdf](http://adni.loni.usc.edu/wp-content/uploads/how-to-apply/ADNI-Acknowledgement-List.pdf)

482 Data collection and sharing for this project was funded by the Alzheimer's Disease Neu-  
483 roimaging Initiative (ADNI) (National Institutes of Health Grant U01 AG024904) and DOD  
484 ADNI (Department of Defense award number W81XWH-12-2-0012). ADNI is funded by the  
485 National Institute on Aging, the National Institute of Biomedical Imaging and Bioengineering,  
486 and through generous contributions from the following: AbbVie, Alzheimer's Association;  
487 Alzheimer's Drug Discovery Foundation; Araclon Biotech; BioClinica, Inc.; Biogen; Bristol-  
488 Myers Squibb Company; CereSpir, Inc.; Cogstate; Eisai Inc.; Elan Pharmaceuticals, Inc.;  
489 Eli Lilly and Company; EuroImmun; F. Hoffmann-La Roche Ltd and its affiliated company  
490 Genentech, Inc.; Fujirebio; GE Healthcare; IXICO Ltd.; Janssen Alzheimer Immunotherapy  
491 Research & Development, LLC.; Johnson & Johnson Pharmaceutical Research & Development  
492 LLC.; Lumosity; Lundbeck; Merck & Co., Inc.; Meso Scale Diagnostics, LLC.; NeuroRx  
493 Research; Neurotrack Technologies; Novartis Pharmaceuticals Corporation; Pfizer Inc.; Pira-  
494 mal Imaging; Servier; Takeda Pharmaceutical Company; and Transition Therapeutics. The  
495 Canadian Institutes of Health Research is providing funds to support ADNI clinical sites  
496 in Canada. Private sector contributions are facilitated by the Foundation for the National  
497 Institutes of Health ([www.fnih.org](http://www.fnih.org)). The grantee organization is the Northern California  
498 Institute for Research and Education, and the study is coordinated by the Alzheimer's  
499 Therapeutic Research Institute at the University of Southern California. ADNI data are



500 disseminated by the Laboratory for Neuro Imaging at the University of Southern California.

## 501 References

- 502 1. R Core Team. *R: A language and environment for statistical computing*. (R Foundation for Statistical Computing, 2020).
- 503 2. Yushkevich, P. A. *et al.* User-guided 3D active contour segmentation of anatomical structures: Significantly improved efficiency and reliability. *Neuroimage* **31**, 1116–1128 (2006).
- 504 3. <https://www.apple.com/pages/>.
- 505 4. <https://www.libreoffice.org/>.
- 506 5. <https://app.diagrams.net>.
- 507 6. Stan Development Team. RStan: The R interface to Stan. (2020).
- 508 7. Bates, D., Mächler, M., Bolker, B. & Walker, S. Fitting linear mixed-effects models using lme4. *Journal of Statistical Software* **67**, 1–48 (2015).
- 509 8. <https://github.com/xl0418/ggradar2>.
- 510 9. Wickham, H. *ggplot2: Elegant graphics for data analysis*. (Springer-Verlag New York, 2016).
- 511 10. Allaire, J. *et al.* *Rmarkdown: Dynamic documents for r*. (2021).
- 512 11. Xie, Y., Allaire, J. J. & Golemund, G. *R markdown: The definitive guide*. (Chapman; Hall/CRC, 2018).
- 513 12. Xie, Y., Dervieux, C. & Riederer, E. *R markdown cookbook*. (Chapman; Hall/CRC, 2020).
- 514 13. Fu, Y. *et al.* DeepReg: A deep learning toolkit for medical image registration. *Journal of Open Source Software* **5**, 2705 (2020).
- 515 14. Vos, B. D. de *et al.* A deep learning framework for unsupervised affine and deformable image registration. *Med Image Anal* **52**, 128–143 (2019).
- 516 15. <https://bicr-resource.atr.jp/srpbs1600/>.
- 517 16. <https://www.oasis-brains.org>.
- 518 17. [http://fcon\\_1000.projects.nitrc.org/indi/pro/nki.html](http://fcon_1000.projects.nitrc.org/indi/pro/nki.html).
- 519 18. <https://brain-development.org/ixi-dataset/>.
- 520 19. Breiman, L. Random forests. *Machine Learning* **45**, 5–32 (2001).

- 521 20. Verbeke, G. Linear mixed models for longitudinal data. in *Linear mixed models in practice* 63–153 (Springer, 1997).
- 522 21. Holbrook, A. J. *et al.* Anterolateral entorhinal cortex thickness as a new biomarker for early detection of Alzheimer’s disease. *Alzheimer’s & Dementia: Diagnosis, Assessment & Disease Monitoring* **12**, e12068 (2020).
- 523 22. Haris, M., Shakhnarovich, G. & Ukita, N. Deep back-projection networks for super-resolution. in *2018 IEEE/CVF Conference on Computer Vision and Pattern Recognition* 1664–1673 (2018). doi:[10.1109/CVPR.2018.00179](https://doi.org/10.1109/CVPR.2018.00179).
- 524 23. Bashyam, V. M. *et al.* MRI signatures of brain age and disease over the lifespan based on a deep brain network and 14,468 individuals worldwide. *Brain* **143**, 2312–2324 (2020).
- 525 24. Clarkson, M. J. *et al.* A comparison of voxel and surface based cortical thickness estimation methods. *Neuroimage* **57**, 856–65 (2011).
- 526 25. Schwarz, C. G. *et al.* A large-scale comparison of cortical thickness and volume methods for measuring alzheimer’s disease severity. *Neuroimage Clin* **11**, 802–812 (2016).
- 527 26. Nyúl, L. G. & Udupa, J. K. On standardizing the MR image intensity scale. *Magn Reson Med* **42**, 1072–81 (1999).
- 528 27. McKinley, R. *et al.* Few-shot brain segmentation from weakly labeled data with deep heteroscedastic multi-task networks. *CoRR* **abs/1904.02436**, (2019).
- 529 28. Gelman, A. & others. Prior distributions for variance parameters in hierarchical models (comment on article by Browne and Draper). *Bayesian analysis* **1**, 515–534 (2006).
- 530 29. Kriegeskorte, N., Simmons, W. K., Bellgowan, P. S. F. & Baker, C. I. Circular analysis in systems neuroscience: The dangers of double dipping. *Nat Neurosci* **12**, 535–40 (2009).
- 531 30. Lemaitre, H. *et al.* Normal age-related brain morphometric changes: Nonuniformity across cortical thickness, surface area and gray matter volume? *Neurobiol Aging* **33**, 617.e1–9 (2012).
- 532 31. Landman, B. A. *et al.* Multi-parametric neuroimaging reproducibility: A 3-T resource study. *Neuroimage* **54**, 2854–66 (2011).
- 533 32. Tustison, N. J. *et al.* Convolutional neural networks with template-based data augmentation for functional lung image quantification. *Acad Radiol* **26**, 412–423 (2019).
- 534 33. Schlemper, J. *et al.* Attention gated networks: Learning to leverage salient regions in medical images. *Med Image Anal* **53**, 197–207 (2019).

- 535 34. Fonov, V. S., Evans, A. C., McKinstry, R. C., Almlí, C. & Collins, D. L. Unbiased nonlinear average age-appropriate brain templates from birth to adulthood. *NeuroImage* **S102**, (2009).
- 536 35. Klein, A. & Tourville, J. 101 labeled brain images and a consistent human cortical labeling protocol. *Front Neurosci* **6**, 171 (2012).
- 537 36. Ashburner, J. & Friston, K. J. Voxel-based morphometry—the methods. *Neuroimage* **11**, 805–21 (2000).
- 538 37. Avants, B. *et al.* Eigenanatomy improves detection power for longitudinal cortical change. *Med Image Comput Comput Assist Interv* **15**, 206–13 (2012).
- 539 38. Henschel, L. *et al.* FastSurfer - a fast and accurate deep learning based neuroimaging pipeline. *Neuroimage* **219**, 117012 (2020).
- 540 39. Rebsamen, M., Rummel, C., Reyes, M., Wiest, R. & McKinley, R. Direct cortical thickness estimation using deep learning-based anatomy segmentation and cortex parcellation. *Hum Brain Mapp* (2020) doi:[10.1002/hbm.25159](https://doi.org/10.1002/hbm.25159).
- 541 40. Li, H. *et al.* Fully convolutional network ensembles for white matter hyperintensities segmentation in MR images. *Neuroimage* **183**, 650–665 (2018).
- 542 41. Tustison, N. J., Avants, B. B. & Gee, J. C. Learning image-based spatial transformations via convolutional neural networks: A review. *Magn Reson Imaging* **64**, 142–153 (2019).
- 543 42. Balakrishnan, G., Zhao, A., Sabuncu, M. R., Guttag, J. & Dalca, A. V. VoxelMorph: A learning framework for deformable medical image registration. *IEEE Trans Med Imaging* (2019) doi:[10.1109/TMI.2019.2897538](https://doi.org/10.1109/TMI.2019.2897538).
- 544 43. Goubran, M. *et al.* Hippocampal segmentation for brains with extensive atrophy using three-dimensional convolutional neural networks. *Hum Brain Mapp* **41**, 291–308 (2020).
- 545 44. Falk, T. *et al.* U-net: Deep learning for cell counting, detection, and morphometry. *Nat Methods* **16**, 67–70 (2019).
- 546 45. Gorgolewski, K. *et al.* Nipype: A flexible, lightweight and extensible neuroimaging data processing framework in python. *Front Neuroinform* **5**, 13 (2011).
- 547 46. Muschelli, J. *et al.* Neuroconductor: An R platform for medical imaging analysis. *Biostatistics* **20**, 218–239 (2019).
- 548 47. Halchenko, Y. O. & Hanke, M. Open is not enough. Let’s take the next step: An integrated, community-driven computing platform for neuroscience. *Front Neuroinform* **6**, 22 (2012).

- 549 48. Gorgolewski, K. J. *et al.* The brain imaging data structure, a format for organizing and describing outputs of neuroimaging experiments. *Sci Data* **3**, 160044 (2016).
- 550 49. De Leener, B. *et al.* SCT: Spinal cord toolbox, an open-source software for processing spinal cord MRI data. *Neuroimage* **145**, 24–43 (2017).
- 551 50. Esteban, O. *et al.* fMRIPrep: A robust preprocessing pipeline for functional MRI. *Nat Methods* **16**, 111–116 (2019).
- 552 51. Tustison, N. J. *et al.* Longitudinal mapping of cortical thickness measurements: An Alzheimer’s Disease Neuroimaging Initiative-based evaluation study. *J Alzheimers Dis* (2019) doi:[10.3233/JAD-190283](https://doi.org/10.3233/JAD-190283).
- 553 52. Tustison, N. J. & Gee, J. C. N4ITK: Nick’s N3 ITK implementation for MRI bias field correction. *The Insight Journal* (2009).
- 554 53. Wang, H. *et al.* Multi-atlas segmentation with joint label fusion. *IEEE Trans Pattern Anal Mach Intell* **35**, 611–23 (2013).
- 555 54. Bajcsy, R. & Kovacic, S. Multiresolution elastic matching. *Computer Vision, Graphics, and Image Processing* **46**, 1–21 (1989).
- 556 55. Bajcsy, R. & Broit, C. Matching of deformed images. in *Sixth International Conference on Pattern Recognition (ICPR’82)* 351–353 (1982).
- 557 56. Manjón, J. V., Coupé, P., Martí-Bonmatí, L., Collins, D. L. & Robles, M. Adaptive non-local means denoising of MR images with spatially varying noise levels. *J Magn Reson Imaging* **31**, 192–203 (2010).
- 558 57. Das, S. R., Avants, B. B., Grossman, M. & Gee, J. C. Registration based cortical thickness measurement. *Neuroimage* **45**, 867–79 (2009).
- 559 58. Avants, B. B., Klein, A., Tustison, N. J., Woo, J. & Gee, J. C. Evaluation of open-access, automated brain extraction methods on multi-site multi-disorder data. in *16th annual meeting for the organization of human brain mapping* (2010).
- 560 59. Gee, J., Sundaram, T., Hasegawa, I., Uematsu, H. & Hatabu, H. Characterization of regional pulmonary mechanics from serial magnetic resonance imaging data. *Acad Radiol* **10**, 1147–52 (2003).
- 561 60. Avants, B. B., Epstein, C. L., Grossman, M. & Gee, J. C. Symmetric diffeomorphic image registration with cross-correlation: Evaluating automated labeling of elderly and neurodegenerative brain. *Med Image Anal* **12**, 26–41 (2008).

- 562 61. Fischl, B. FreeSurfer. *Neuroimage* **62**, 774–81 (2012).
- 563 62. Menze, B., Reyes, M. & Van Leemput, K. The multimodal brain tumor image segmentation benchmark (BRATS). *IEEE Trans Med Imaging* (2014) doi:[10.1109/TMI.2014.2377694](https://doi.org/10.1109/TMI.2014.2377694).
- 564 63. Wang, H. & Yushkevich, P. A. Multi-atlas segmentation with joint label fusion and corrective learning—an open source implementation. *Front Neuroinform* **7**, 27 (2013).
- 565 64. Avants, B. B. *et al.* The optimal template effect in hippocampus studies of diseased populations. *Neuroimage* **49**, 2457–66 (2010).
- 566 65. Klein, A. *et al.* Evaluation of 14 nonlinear deformation algorithms applied to human brain MRI registration. *Neuroimage* **46**, 786–802 (2009).
- 567 66. Tustison, N. J. *et al.* Large-scale evaluation of ANTs and FreeSurfer cortical thickness measurements. *Neuroimage* **99**, 166–79 (2014).
- 568 67. Tustison, N. J. *et al.* N4ITK: Improved N3 bias correction. *IEEE Trans Med Imaging* **29**, 1310–20 (2010).
- 569 68. Avants, B. B., Tustison, N. J., Wu, J., Cook, P. A. & Gee, J. C. An open source multivariate framework for *n*-tissue segmentation with evaluation on public data. *Neuroinformatics* **9**, 381–400 (2011).
- 570 69. Murphy, K. *et al.* Evaluation of registration methods on thoracic CT: The EMPIRE10 challenge. *IEEE Trans Med Imaging* **30**, 1901–20 (2011).
- 571 70. Tustison, N. J. *et al.* Instrumentation bias in the use and evaluation of scientific software: Recommendations for reproducible practices in the computational sciences. *Front Neurosci* **7**, 162 (2013).

572 **Author contributions**

- 573 • Conception and design N.T., A.H., M.Y., J.S., B.A.
- 574 • Analysis and interpretation N.T., A.H., D.G., M.Y., J.S. B.A.
- 575 • Creation of new software N.T., P.C., H.J., J.M., G.D., J.D., S.D., N.C., J.G., B.A.
- 576 • Drafting of manuscript N.T., A.H., P.C., H.J., J.M., G.D., J.G., B.A.

577 **Competing interests**

578 The authors declare no competing interests.
